# Supplementary material
Source: PubMed Central journal article supplement (PMC4083230)
Supplement: jn.112.165266_nutrition165266SupplementaryData1.pdf [file jn.112.165266_nutrition165266SupplementaryData1.pdf]

**Online Supporting Material, Supplemental Table 1**

**Navajo Healthy Stores intervention: Promoted foods and behaviors by phase**

| Phase | Theme                                             | Promoted Foods                                                                                                                                 | Promoted Behaviors                                                                                                                                                 |
|-------|---------------------------------------------------|------------------------------------------------------------------------------------------------------------------------------------------------|--------------------------------------------------------------------------------------------------------------------------------------------------------------------|
| 0     | Introduction of NHS in stores                     | ---                                                                                                                                            | Increased awareness of program in local stores and community<br><br>Build anticipation                                                                             |
| 1     | Healthy Beverages and Breads                      | Bottled water<br><br>Diet sodas<br><br>Sugar free drink mixes<br><br>Whole wheat breads<br><br>Blue corn bread<br><br>Wheat and corn tortillas | Recognize store intervention materials<br><br>Choose healthier drinks and drink lots of water<br><br>Eat whole wheat and whole grain breads                        |
| 2     | Healthy Cooking Methods<br><br>Better Potatoes    | Cooking spray<br><br>Vegetable oils<br><br>Potatoes<br><br>Eggs<br><br>Lean hamburger meat                                                     | Use cooking spray or canola oil<br><br>Drain fat and rinse<br><br>Healthier cooking methods (bake, grill, steam)<br><br>Reduce portion size<br><br>Buy leaner meat |
| 3     | Healthier Luncheon Meats<br><br>Eat in Moderation | Low fat luncheon meats<br><br>Spam Lite<br><br>Water                                                                                           | Choose lower fat lunch meats<br><br>Avoid mayonnaise<br><br>Eat more fresh fruits and vegetables<br><br>Reduce portion size and drink water before eating          |
| 4     | Better, Healthier Meals                           | Fresh fruits and vegetables                                                                                                                    | Prepare healthy meals at home                                                                                                                                      |

|   |                               |                                          |                                                   |
|---|-------------------------------|------------------------------------------|---------------------------------------------------|
|   |                               | Lean cuts of meat                        | Eat together as a family                          |
|   |                               | Variety of fish                          | Choose salad and fresh fruits and vegetables      |
| 5 | Healthier Snacks and Desserts | Baked potato chips                       | Bring your lunch from home                        |
|   |                               | Baked tortilla chips                     | Eat baked chips/tortillas and pretzels for snacks |
|   |                               | Unsalted pretzels                        | Read the food labels                              |
|   |                               | Fresh fruits                             | Choose fresh fruits for snacks or dessert         |
|   |                               | Snack vegetables                         | Snack on fresh vegetables                         |
| 6 | Planning Ahead                | Lower fat or fat free dressings and dips | Save time and money                               |
|   | Healthy and Affordable Meals  | Fresh fruits and vegetables              | Plan ahead and prepare healthy meals              |
|   |                               | Snack vegetables                         | Use food and shelf labels when selecting food     |
|   |                               |                                          | Choose items that are fresh and low in fat        |

---

**Online Supporting Material, Supplemental Table 2**

**Examples of Questions and Scoring for Scale Construction**

| Scales (Cronbach's Alpha: baseline & post-intervention)     | Sample questions                 | Sample Answers                              | Sample coding |
|-------------------------------------------------------------|----------------------------------|---------------------------------------------|---------------|
| Knowledge score<br>(Baseline 0.67; post-intervention 0.66). | Which cereal has most fiber?     | Frosted flakes                              | 0             |
|                                                             |                                  | Corn flakes                                 | 1             |
|                                                             |                                  | Shredded wheat                              | 2             |
|                                                             |                                  | Don't know                                  | 0             |
|                                                             | Which drink has fewest calories? | Diet soda                                   | 1             |
|                                                             |                                  | Regular soda                                | 0             |
|                                                             |                                  | Gatorade                                    | 0             |
|                                                             |                                  | Don't know                                  | 0             |
| Self-efficacy score<br>(0.88, 0.88)                         | Using cooking spray like Pam:    | Would be impossible for you to do regularly | 1             |
|                                                             |                                  | Would be very hard for you to do regularly  | 2             |

|                                     |                                                                                                                       |                                               |    |
|-------------------------------------|-----------------------------------------------------------------------------------------------------------------------|-----------------------------------------------|----|
|                                     |                                                                                                                       | Would be kind of hard for you to do regularly | 3  |
|                                     |                                                                                                                       | Very easy for you to do                       | 4  |
| Intention score<br>(0.74, 0.78)     | If you buy milk which would you buy?                                                                                  | Regular, whole milk                           | 0  |
|                                     |                                                                                                                       | 2% reduced fat milk                           | 1  |
|                                     |                                                                                                                       | 1% or skim milk                               | 2  |
|                                     | If you wanted a snack which would you pick?                                                                           | Potato chips/Doritos                          | 0  |
|                                     |                                                                                                                       | Pretzels                                      | 1  |
|                                     |                                                                                                                       | Baked chips                                   | 1  |
| Label reading score<br>(0.82, 0.82) | First label – How many servings are in the entire bar?                                                                | 8                                             | 1  |
|                                     |                                                                                                                       | Other answers                                 | 0  |
|                                     | Second label- how many grams are there in each serving                                                                | 10                                            | 1  |
|                                     |                                                                                                                       | 10g                                           | 1  |
|                                     |                                                                                                                       | Other answers                                 | 0  |
| Cooking score<br>(0.65, std 0.71)   | Enter the 1 <sup>st</sup> (or 2 <sup>nd</sup> ) most common method used for cooking ground beef (or other food items) | Did not cook                                  | 0  |
|                                     |                                                                                                                       | Deep fried                                    | -2 |
|                                     |                                                                                                                       | Pan fried                                     | -1 |

|                                                   |                                                                                         |                                                   |           |
|---------------------------------------------------|-----------------------------------------------------------------------------------------|---------------------------------------------------|-----------|
|                                                   |                                                                                         | Pan fried in own fat or water                     | 0         |
|                                                   |                                                                                         | Pan fried in own fat or water, drained and rinsed | 2         |
|                                                   |                                                                                         | Cooking spray                                     | 1         |
| Healthy food getting frequency<br>(0.93, 0.93)    | Enter the number of times the respondent got whole wheat bread (or other healthy foods) | frequency                                         | frequency |
| Unhealthy food getting frequency<br>(0.77, 0.83)  | Enter the number of times the respondent got regular bologna (or other unhealthy foods) | frequency                                         | frequency |
| Perception of healthy foods score<br>(0.87, 0.84) | Healthy foods are expensive                                                             | Strongly disagree                                 | 5         |
|                                                   |                                                                                         | Disagree                                          | 4         |
|                                                   |                                                                                         | Undecided                                         | 3         |
|                                                   |                                                                                         | Agree                                             | 2         |
|                                                   |                                                                                         | Strongly agree                                    | 1         |
| Self-perception score<br>(baseline only) (0.65)   | I am satisfied with my weight                                                           | Strongly disagree                                 | 1         |
|                                                   |                                                                                         | Disagree                                          | 2         |
|                                                   |                                                                                         | Undecided                                         | 3         |
|                                                   |                                                                                         | Agree                                             | 4         |

|                                                                                           |                                                                                                                                                                                                            |                         |   |
|-------------------------------------------------------------------------------------------|------------------------------------------------------------------------------------------------------------------------------------------------------------------------------------------------------------|-------------------------|---|
|                                                                                           |                                                                                                                                                                                                            | Strongly agree          | 5 |
| Shelf label-driven healthy food purchasing score I. (post-intervention only) <sup>1</sup> | Have you ever purchased a food because you saw one of the healthy stores shelf labels under it?                                                                                                            | Always or almost always | 5 |
|                                                                                           |                                                                                                                                                                                                            | Often                   | 4 |
|                                                                                           |                                                                                                                                                                                                            | Sometimes               | 3 |
|                                                                                           |                                                                                                                                                                                                            | Rarely                  | 2 |
|                                                                                           |                                                                                                                                                                                                            | Never                   | 1 |
| Shelf label-driven healthy food purchasing score II. (post-intervention only) (0.92)      | If yes (to above question), which of the following foods did you EVER buy in the last year BECAUSE you saw a Healthy Stores shelf label like the one I just showed you? (e.g., water, diet soda, soy milk) | Check                   | 1 |
|                                                                                           |                                                                                                                                                                                                            | Uncheck                 | 0 |

---

<sup>1</sup> This score involves only 1 question, therefore no alpha available.
